# Supplementary material
Source: ML conference proceedings conference paper supplement (https://proceedings.mlr.press/v37/cortes15.html)
Supplement: Supplementary file [file cortes15-supp.pdf]

## A. Duality

The following is a version of the Fenchel duality theorem (see (Rockafellar, 1997)).

**Theorem 5.** *Let  $X$  and  $Y$  be Banach spaces, and  $f: X \rightarrow \mathbb{R} \cup \{+\infty\}$  and  $g: Y \rightarrow \mathbb{R} \cup \{+\infty\}$  convex functions. Let  $A: X \rightarrow Y$  be a bounded linear map. If  $g$  is continuous at some point  $y \in A \text{ dom}(f)$ , then the following holds:*

$$\inf_{x \in X} (f(x) + g(Ax)) = \sup_{y^* \in Y^*} (-f^*(A^*y^*) - g^*(-y^*)), \quad (16)$$

where  $f^*$  and  $g^*$  are conjugate functions of  $f$  and  $g$  respectively, and  $A^*$  the adjoint of  $A$ . Furthermore, the supremum in (16) is attained if it is finite.

The following lemma gives the expression of the conjugate function of the (extended) relative entropy, which is a standard result (Boyd & Vandenberghe, 2004).

**Lemma 6** (Conjugate function of the relative entropy). *Let  $f: \mathbb{R}^{\mathcal{X}} \rightarrow \mathbb{R}$  be defined by  $f(\mathbf{p}) = D(\mathbf{p} \parallel \mathbf{p}_0)$  if  $\mathbf{p} \in \Delta$  and  $f(\mathbf{p}) = +\infty$  elsewhere. Then, the conjugate function of  $f$  is the function  $f^*: \mathbb{R}^{\mathcal{X}} \rightarrow \mathbb{R}$  defined for all  $\mathbf{q} \in \mathbb{R}^{\mathcal{X}}$  by*

$$f^*(\mathbf{q}) = \log \left( \sum_{x \in \mathcal{X}} \mathbf{p}_0[x] e^{\mathbf{q}[x]} \right) = \log \left( \mathbb{E}_{x \sim \mathbf{p}_0} [e^{\mathbf{q}[x]}] \right).$$

*Proof.* By definition of  $f$ , for any  $\mathbf{q} \in \mathbb{R}^{\mathcal{X}}$ , we can write

$$\sup_{\mathbf{p} \in \mathbb{R}^{\mathcal{X}}} (\langle \mathbf{p}, \mathbf{q} \rangle - D(\mathbf{p} \parallel \mathbf{p}_0)) = \sup_{\mathbf{p} \in \Delta} (\langle \mathbf{p}, \mathbf{q} \rangle - D(\mathbf{p} \parallel \mathbf{p}_0)).$$

Fix  $\mathbf{q} \in \mathbb{R}^{\mathcal{X}}$  and let  $\bar{\mathbf{q}} \in \Delta$  be defined for all  $x \in \mathcal{X}$  by

$$\bar{\mathbf{q}}[x] = \frac{\mathbf{p}_0[x] e^{\mathbf{q}[x]}}{\sum_{x \in \mathcal{X}} \mathbf{p}_0[x] e^{\mathbf{q}[x]}} = \frac{\mathbf{p}_0[x] e^{\mathbf{q}[x]}}{\mathbb{E}_{\mathbf{p}_0}[e^{\mathbf{q}}]}. \quad (17)$$

Then, the following holds for all  $\mathbf{p} \in \Delta$ :

$$\begin{aligned} \langle \mathbf{p}, \mathbf{q} \rangle - D(\mathbf{p} \parallel \mathbf{p}_0) &= \mathbb{E}_{\mathbf{p}}[\log(e^{\mathbf{q}})] - \mathbb{E}_{\mathbf{p}} \left[ \log \frac{\mathbf{p}}{\mathbf{p}_0} \right] \\ &= \mathbb{E}_{\mathbf{p}} \left[ \log \frac{\mathbf{p}_0 e^{\mathbf{q}}}{\mathbf{p}} \right] \\ &= -D(\mathbf{p} \parallel \bar{\mathbf{q}}) + \log \mathbb{E}_{\mathbf{p}_0}[e^{\mathbf{q}}]. \end{aligned}$$

Since  $D(\mathbf{p} \parallel \bar{\mathbf{q}}) \geq 0$  and  $D(\mathbf{p} \parallel \bar{\mathbf{q}}) = 0$  for  $\mathbf{p} = \bar{\mathbf{q}}$ , this shows that  $\sup_{\mathbf{p} \in \Delta} (\langle \mathbf{p}, \mathbf{q} \rangle - D(\mathbf{p} \parallel \mathbf{p}_0)) = \log(\mathbb{E}_{\mathbf{p}_0}[e^{\mathbf{q}}])$  and concludes the proof.  $\square$

**Theorem 1.** *Problem (2) and (3) are equivalent to the dual optimization problem  $\sup_{\mathbf{w} \in \mathbb{R}^N} G(\mathbf{w})$ :*

$$\sup_{\mathbf{w} \in \mathbb{R}^N} G(\mathbf{w}) = \min_{\mathbf{p}} F(\mathbf{p}). \quad (18)$$

Furthermore, let  $\mathbf{p}^* = \arg\min_{\mathbf{p}} F(\mathbf{p})$ , then, for any  $\epsilon > 0$  and any  $\mathbf{w}$  such that  $|G(\mathbf{w}) - \sup_{\mathbf{w} \in \mathbb{R}^N} G(\mathbf{w})| < \epsilon$ , the following inequality holds:  $D(\mathbf{p}^* \parallel \mathbf{p}_{\mathbf{w}}) \leq \epsilon$ .

*Proof.* The proof follows by application of the Fenchel duality theorem (Theorem 5, Appendix A) to the optimization problem (3) with the functions  $f$  and  $g$  defined for all  $\mathbf{p}$  and  $\mathbf{u}$  by  $f(\mathbf{p}) = D(\mathbf{p} \parallel \mathbf{p}_0) + I_{\Delta}(\mathbf{p})$  and  $g(\mathbf{u}) = I_C(\mathbf{u})$  and with  $A$  the linear map defined by  $A\mathbf{p} = \mathbb{E}_{\mathbf{p}}[\Phi]$ .

$A$  is a bounded linear map since  $\|A\| \leq \|\Phi\|_{\infty} \leq \Lambda$  and  $A^*\mathbf{w} = \mathbf{w} \cdot \Phi$ . Furthermore, define  $\mathbf{u} \in \mathbb{F}$  by  $\mathbf{u}_k = \mathbb{E}_{\mathbf{p}}[\Phi_k]$ . Then,  $\mathbf{u}$  is in  $A \text{ dom} f$  and is in  $C$ . Since  $\beta_k > 0$  for all  $k$ ,  $\mathbf{u}$  is contained in  $\text{int}(C)$ .  $g = I_C$  equals zero over  $\text{int}(C)$  and is therefore continuous over  $\text{int}(C)$ , thus  $g$  is continuous at  $\mathbf{u} \in A \text{ dom} f$ .

By Lemma 6, the conjugate of  $f$  is the function  $f^*: \mathbb{R}^{\mathcal{X}} \rightarrow \mathbb{R}$  defined by  $f^*(\mathbf{q}) = \log(\sum_{x \in \mathcal{X}} \mathbf{p}_0[x] e^{\mathbf{q}[x]})$  for all  $\mathbf{q} \in \mathbb{R}^{\mathcal{X}}$ . The conjugate function of  $g = I_C$  is the function  $g^*$  defined for all  $\mathbf{w} \in \mathbb{R}^N$  by

$$\begin{aligned} g^*(\mathbf{w}) &= \sup_{\mathbf{u} \in C} (\mathbf{w} \cdot \mathbf{u} - I_C(\mathbf{u})) \\ &= \sup_{\mathbf{u} \in C} (\mathbf{w} \cdot \mathbf{u}) \\ &= \sup_{\mathbf{u} \in C} \left( \sum_{k=1}^p \mathbf{w}_k \cdot \mathbf{u}_k \right) \\ &= \sum_{k=1}^p \sup_{\|\mathbf{u}_k - \mathbb{E}_S[\Phi_k]\|_{\infty} \leq \beta_k} (\mathbf{w}_k \cdot \mathbf{u}_k) \\ &= \sum_{k=1}^p \mathbf{w}_k \cdot \mathbb{E}_S[\Phi_k] + \sum_{k=1}^p \sup_{\|\mathbf{u}_k\|_{\infty} \leq \beta_k} (\mathbf{w}_k \cdot \mathbf{u}_k) \\ &= \mathbb{E}_S[\mathbf{w} \cdot \Phi] + \sum_{k=1}^p \beta_k \|\mathbf{w}_k\|_1, \end{aligned}$$

where the penultimate equality holds by definition of the dual norm. In view of these identities, we can write

$$\begin{aligned} &-f^*(A^*\mathbf{w}) - g^*(-\mathbf{w}) \\ &= -\log \left( \sum_{x \in \mathcal{X}} \mathbf{p}_0[x] e^{\mathbf{w} \cdot \Phi(x)} \right) + \mathbb{E}_S[\mathbf{w} \cdot \Phi] - \sum_{k=1}^p \beta_k \|\mathbf{w}_k\|_1 \\ &= -\log Z_{\mathbf{w}} + \frac{1}{m} \sum_{i=1}^m \mathbf{w} \cdot \Phi(x_i) - \sum_{k=1}^p \beta_k \|\mathbf{w}_k\|_1 \\ &= \frac{1}{m} \sum_{i=1}^m \log \frac{e^{\mathbf{w} \cdot \Phi(x_i)}}{Z_{\mathbf{w}}} - \sum_{k=1}^p \beta_k \|\mathbf{w}_k\|_1 \\ &= \frac{1}{m} \sum_{i=1}^m \log \left[ \frac{\mathbf{p}_{\mathbf{w}}[x_i]}{\mathbf{p}_0[x_i]} \right] - \sum_{k=1}^p \beta_k \|\mathbf{w}_k\|_1 = G(\mathbf{w}), \end{aligned}$$

which proves that  $\sup_{\mathbf{w} \in \mathbb{R}^N} G(\mathbf{w}) = \min_{\mathbf{p}} F(\mathbf{p})$ . For any

$\mathbf{w} \in \mathbb{R}^N$ , we can write

$$\begin{aligned}
 & G(\mathbf{w}) - D(\mathbf{p}^* \parallel \mathbf{p}_0) \\
 &= \mathbb{E}_{x \sim \hat{\mathbf{p}}} \left[ \log \frac{\mathbf{p}_{\mathbf{w}}[x]}{\mathbf{p}_0[x]} \right] - \sum_{k=1}^p \beta_k \|\mathbf{w}_k\|_1 - \mathbb{E}_{x \sim \mathbf{p}^*} \left[ \log \frac{\mathbf{p}^*[x]}{\mathbf{p}_0[x]} \right] \\
 &= \mathbb{E}_{x \sim \hat{\mathbf{p}}} \left[ \log \frac{\mathbf{p}_{\mathbf{w}}[x]}{\mathbf{p}_0[x]} \right] - \sum_{k=1}^p \beta_k \|\mathbf{w}_k\|_1 - \\
 &\quad \mathbb{E}_{x \sim \mathbf{p}^*} \left[ \log \frac{\mathbf{p}^*[x] \mathbf{p}_{\mathbf{w}}[x]}{\mathbf{p}_{\mathbf{w}}[x] \mathbf{p}_0[x]} \right] \\
 &= -D(\mathbf{p}^* \parallel \mathbf{p}_{\mathbf{w}}) - \sum_{k=1}^p \beta_k \|\mathbf{w}_k\|_1 \\
 &\quad + \mathbb{E}_{x \sim \hat{\mathbf{p}}} \left[ \log \frac{\mathbf{p}_{\mathbf{w}}[x]}{\mathbf{p}_0[x]} \right] - \mathbb{E}_{x \sim \mathbf{p}^*} \left[ \log \frac{\mathbf{p}_{\mathbf{w}}(x)}{\mathbf{p}_0(x)} \right].
 \end{aligned}$$

The difference of the last two terms can be expressed as follows

$$\begin{aligned}
 & \mathbb{E}_{x \sim \hat{\mathbf{p}}} \left[ \log \frac{\mathbf{p}_{\mathbf{w}}[x]}{\mathbf{p}_0[x]} \right] - \mathbb{E}_{x \sim \mathbf{p}^*} \left[ \log \frac{\mathbf{p}_{\mathbf{w}}[x]}{\mathbf{p}_0[x]} \right] \\
 &= \mathbb{E}_{x \sim \hat{\mathbf{p}}} [\mathbf{w} \cdot \Phi(x) - \log Z_{\mathbf{w}}] - \mathbb{E}_{x \sim \mathbf{p}^*} [\mathbf{w} \cdot \Phi(x) - \log Z_{\mathbf{w}}] \\
 &= \mathbb{E}_{x \sim \hat{\mathbf{p}}} [\mathbf{w} \cdot \Phi(x)] - \mathbb{E}_{x \sim \mathbf{p}^*} [\mathbf{w} \cdot \Phi(x)].
 \end{aligned}$$

Plugging back this equality and rearranging yields

$$\begin{aligned}
 D(\mathbf{p}^* \parallel \mathbf{p}_{\mathbf{w}}) &= D(\mathbf{p}^* \parallel \mathbf{p}_0) - G(\mathbf{w}) \\
 &\quad - \sum_{k=1}^p \beta_k \|\mathbf{w}_k\|_1 + \mathbf{w} \cdot \left( \mathbb{E}_{x \sim \hat{\mathbf{p}}} [\Phi(x)] - \mathbb{E}_{x \sim \mathbf{p}^*} [\Phi(x)] \right).
 \end{aligned}$$

The solution of the primal optimization,  $\mathbf{p}^*$ , verifies the constraint  $I_C(\mathbb{E}_{\mathbf{p}^*}[\Phi]) = 0$ , that is  $\|\mathbb{E}_{x \sim \hat{\mathbf{p}}}[\Phi_k(x)] - \mathbb{E}_{x \sim \mathbf{p}^*}[\Phi_k(x)]\|_{\infty} \leq \beta_k$  for all  $k \in [1, p]$ . By Hölder's inequality, this implies that

$$\begin{aligned}
 & - \sum_{k=1}^p \beta_k \|\mathbf{w}_k\|_1 + \mathbf{w} \cdot \left( \mathbb{E}_{x \sim \hat{\mathbf{p}}} [\Phi(x)] - \mathbb{E}_{x \sim \mathbf{p}^*} [\Phi(x)] \right) \\
 &= - \sum_{k=1}^p \beta_k \|\mathbf{w}_k\|_1 + \sum_{k=1}^p \mathbf{w}_k \cdot \left( \mathbb{E}_{x \sim \hat{\mathbf{p}}} [\Phi_k(x)] - \mathbb{E}_{x \sim \mathbf{p}^*} [\Phi_k(x)] \right) \\
 &\leq - \sum_{k=1}^p \beta_k \|\mathbf{w}_k\|_1 + \sum_{k=1}^p \beta_k \|\mathbf{w}_k\|_1 = 0.
 \end{aligned}$$

Thus, we can write, for any  $\mathbf{w} \in \mathbb{R}^N$ ,

$$D(\mathbf{p}^* \parallel \mathbf{p}_{\mathbf{w}}) \leq D(\mathbf{p}^* \parallel \mathbf{p}_0) - G(\mathbf{w}).$$

Now, assume that  $\mathbf{w}$  verifies  $|G(\mathbf{w}) - \sup_{\mathbf{w} \in \mathbb{R}^N} G(\mathbf{w})| \leq \epsilon$  for some  $\epsilon > 0$ . Then,  $D(\mathbf{p}^* \parallel \mathbf{p}_0) - G(\mathbf{w}) = \sup_{\mathbf{w}} G(\mathbf{w}) - G(\mathbf{w}) \leq \epsilon$  implies  $D(\mathbf{p}^* \parallel \mathbf{p}_{\mathbf{w}}) \leq \epsilon$ . This concludes the proof of the theorem.  $\square$

**Theorem 4.** Problem (10) is equivalent to dual optimization problem  $\sup_{\mathbf{w} \in \mathbb{R}^N} \tilde{G}(\mathbf{w})$ :

$$\sup_{\mathbf{w} \in \mathbb{R}^N} \tilde{G}(\mathbf{w}) = \min_{\mathbf{p}} \tilde{F}(\mathbf{p}). \quad (19)$$

Furthermore, let  $\mathbf{p}^* = \operatorname{argmin}_{\mathbf{p}} \tilde{F}(\mathbf{p})$ . Then, for any  $\epsilon > 0$  and any  $\mathbf{w}$  such that  $|\tilde{G}(\mathbf{w}) - \sup_{\mathbf{w} \in \mathbb{R}^N} \tilde{G}(\mathbf{w})| < \epsilon$ , we have  $\mathbb{E}_{x \sim \hat{\mathbf{p}}} [D(\mathbf{p}^*[\cdot|x] \parallel \mathbf{p}_0[\cdot|x])] \leq \epsilon$ .

*Proof.* The proof follows by application of the Fenchel duality theorem (Theorem 5, Appendix A) to the optimization problem (11) with the functions  $\tilde{f}$  and  $\tilde{g}$  defined for all  $\mathbf{p}$  and  $\mathbf{u}$  by  $\tilde{f}(\mathbf{p}) = \mathbb{E}_{x \sim \hat{\mathbf{p}}} [D(\mathbf{p}[\cdot|x] \parallel \mathbf{p}_0[\cdot|x]) + I_{\Delta}(\mathbf{p}[\cdot|x])]$  and  $\tilde{g}(\mathbf{u}) = I_C(\mathbf{u})$  and with  $A$  the linear map defined by  $A\mathbf{p} = \mathbb{E}_{\substack{x \sim \hat{\mathbf{p}} \\ y \sim \mathbf{p}[\cdot|x]}} [\Phi(x, y)]$ .

$A$  is a bounded linear map since  $\|A\| \leq \|\Phi\|_{\infty} \leq \Lambda$ . Note that

$$\begin{aligned}
 A\mathbf{p} &= \mathbb{E}_{\substack{x \sim \hat{\mathbf{p}} \\ y \sim \mathbf{p}[\cdot|x]}} [\Phi(x, y)] = \sum_{x \in \mathcal{X}} \sum_{y \in \mathcal{Y}} \Phi(x, y) \hat{\mathbf{p}}[x] \mathbf{p}[y|x] \\
 &= \sum_{x \in \operatorname{supp}(\hat{\mathbf{p}})} (\hat{\mathbf{p}}[x] \Phi(x, \cdot)) \cdot (\mathbf{p}[\cdot|x]).
 \end{aligned}$$

Thus, the conjugate of  $A$  is defined for all  $\mathbf{w} \in \mathbb{R}^N$  by  $A^*\mathbf{w} = \mathbf{w} \cdot (\hat{\mathbf{p}}(x) \Phi(x, y))$ . Furthermore, define  $\mathbf{u} \in \mathbb{F}$  by  $\mathbf{u}_k = \mathbb{E}_{(x, y) \sim S} [\Phi_k(x, y)]$ . Then,  $\mathbf{u}$  is in  $A \operatorname{dom} f$  and is in  $C$ . Since  $\beta_k > 0$  for all  $k$ ,  $\mathbf{u}$  is contained in  $\operatorname{int}(C)$ .  $g = I_C$  equals zero over  $\operatorname{int}(C)$  and is therefore continuous over  $\operatorname{int}(C)$ , thus  $g$  is continuous at  $\mathbf{u} \in A \operatorname{dom} f$ .

The conjugate function of  $\tilde{f}$  is defined for all  $\mathbf{q} = (\mathbf{q}[\cdot|x_i])_{i \in [1, m]}$  by

$$\begin{aligned}
 \tilde{f}^*(\mathbf{q}) &= \sup_{\mathbf{p}[\cdot|x] \in \Delta} \left\{ \langle \mathbf{p}, \mathbf{q} \rangle - \sum_{x \in \mathcal{X}} \hat{\mathbf{p}}[x] D(\mathbf{p}[\cdot|x] \parallel \mathbf{p}_0[\cdot|x]) \right\} \\
 &= \sup_{\mathbf{p}[\cdot|x] \in \Delta} \left\{ \sum_{x \in \operatorname{supp}(\hat{\mathbf{p}})} \hat{\mathbf{p}}[x] \sum_{y \in \mathcal{Y}} \mathbf{p}[y|x] \mathbf{q}[y|x] (\hat{\mathbf{p}}[x])^{-1} \right. \\
 &\quad \left. - \sum_{x \in \operatorname{supp}(\hat{\mathbf{p}})} \hat{\mathbf{p}}[x] D(\mathbf{p}[\cdot|x] \parallel \mathbf{p}_0[\cdot|x]) \right\} \\
 &= \sum_{x \in \operatorname{supp}(\hat{\mathbf{p}})} \hat{\mathbf{p}}[x] \sup_{\mathbf{p}[\cdot|x]} \left\{ \sum_{y \in \mathcal{Y}} \mathbf{p}[y|x] \left( \frac{\mathbf{q}[y|x]}{\hat{\mathbf{p}}[x]} \right) \right. \\
 &\quad \left. - D(\mathbf{p}[\cdot|x] \parallel \mathbf{p}_0[\cdot|x]) \right\} \\
 &= \sum_{x \in \operatorname{supp}(\hat{\mathbf{p}})} \hat{\mathbf{p}}[x] f_x^* \left( \frac{\mathbf{q}[y|x]}{\hat{\mathbf{p}}[x]} \right)
 \end{aligned}$$

where  $f_x$  is defined for all  $x \in \mathcal{X}$  and  $\mathbf{p}' \in \mathbb{R}^{\mathcal{Y}}$  by  $f_x(\mathbf{p}') = D(\mathbf{p}' \parallel \mathbf{p}_0[\cdot|x])$  if  $\mathbf{p}' \in \Delta$ ,  $f_x(\mathbf{p}') = +\infty$  otherwise. By

Lemma 6,  $f_x^* \left( \frac{q[y|x]}{\hat{p}[x]} \right) = \log \left( \sum_{y \in \mathcal{Y}} p_0[y|x] e^{\frac{q[y|x]}{\hat{p}[x]}} \right)$ , thus,  $\tilde{f}^*$  is given by

$$\tilde{f}^*(\mathbf{q}) = \mathbb{E}_{x \sim \hat{p}} \left[ \log \left( \sum_{y \in \mathcal{Y}} p_0[y|x] e^{\frac{q[y|x]}{\hat{p}[x]}} \right) \right].$$

In view of these identities, we can write

$$\begin{aligned} & -\tilde{f}^*(A^* \mathbf{w}) - \tilde{g}^*(-\mathbf{w}) \\ &= -\mathbb{E}_{x \sim \hat{p}} \left[ \log \left( \sum_{y \in \mathcal{Y}} p_0[y|x] e^{\mathbf{w} \cdot \Phi(x,y)} \right) \right] \\ & \quad + \mathbb{E}_S [\mathbf{w} \cdot \Phi] - \sum_{k=1}^p \beta_k \|\mathbf{w}_k\|_1 \\ &= -\mathbb{E}_{x \sim \hat{p}} [\log Z_{\mathbf{w}}(x)] + \frac{1}{m} \sum_{i=1}^m \mathbf{w} \cdot \Phi(x_i, y_i) - \sum_{k=1}^p \beta_k \|\mathbf{w}_k\|_1 \\ &= \frac{1}{m} \sum_{i=1}^m \log \frac{e^{\mathbf{w} \cdot \Phi(x_i, y_i)}}{Z_{\mathbf{w}}(x_i)} - \sum_{k=1}^p \beta_k \|\mathbf{w}_k\|_1 \\ &= \frac{1}{m} \sum_{i=1}^m \log \left[ \frac{p_{\mathbf{w}}[y_i|x_i]}{p_0[y_i|x_i]} \right] - \sum_{k=1}^p \beta_k \|\mathbf{w}_k\|_1 = \tilde{G}(\mathbf{w}), \end{aligned}$$

which proves that  $\sup_{\mathbf{w} \in \mathbb{R}^N} \tilde{G}(\mathbf{w}) = \min_{\mathbf{p}} \tilde{F}(\mathbf{p})$ . The second part of the proof is similar to that of Theorem 1. For any  $\mathbf{w} \in \mathbb{R}^N$ , we can write

$$\begin{aligned} & \tilde{G}(\mathbf{w}) - \mathbb{E}_{x \sim \hat{p}} [D(p^*[\cdot|x] \parallel p_0[\cdot|x])] \\ &= \mathbb{E}_{(x,y) \sim S} \left[ \log \frac{p_{\mathbf{w}}[y|x]}{p_0[y|x]} \right] - \sum_{k=1}^p \beta_k \|\mathbf{w}_k\|_1 \\ & \quad - \mathbb{E}_{\substack{x \sim \hat{p} \\ y \sim p^*[\cdot|x]}} \left[ \log \frac{p^*[y|x]}{p_0[y|x]} \right] \\ &= \mathbb{E}_{(x,y) \sim S} \left[ \log \frac{p_{\mathbf{w}}[y|x]}{p_0[y|x]} \right] - \sum_{k=1}^p \beta_k \|\mathbf{w}_k\|_1 - \\ & \quad \mathbb{E}_{\substack{x \sim \hat{p} \\ y \sim p^*[\cdot|x]}} \left[ \log \frac{p^*[y|x] p_{\mathbf{w}}[y|x]}{p_{\mathbf{w}}[y|x] p_0[y|x]} \right] \\ &= -\mathbb{E}_{x \sim \hat{p}} [D(p^*[\cdot|x] \parallel p_{\mathbf{w}}[\cdot|x])] - \sum_{k=1}^p \beta_k \|\mathbf{w}_k\|_1 \\ & \quad + \mathbb{E}_{(x,y) \sim S} \left[ \log \frac{p_{\mathbf{w}}[y|x]}{p_0[y|x]} \right] - \mathbb{E}_{\substack{x \sim \hat{p} \\ y \sim p^*[\cdot|x]}} \left[ \log \frac{p_{\mathbf{w}}[y|x]}{p_0[y|x]} \right]. \end{aligned}$$

The difference of the last two terms can be expressed as

follows

$$\begin{aligned} & \mathbb{E}_{(x,y) \sim S} \left[ \log \frac{p_{\mathbf{w}}[y|x]}{p_0[y|x]} \right] - \mathbb{E}_{\substack{x \sim \hat{p} \\ y \sim p^*[\cdot|x]}} \left[ \log \frac{p_{\mathbf{w}}[y|x]}{p_0[y|x]} \right] \\ &= \mathbb{E}_{(x,y) \sim S} [\mathbf{w} \cdot \Phi(x,y) - \log Z_{\mathbf{w}}(x)] \\ & \quad - \mathbb{E}_{\substack{x \sim \hat{p} \\ y \sim p^*[\cdot|x]}} [\mathbf{w} \cdot \Phi(x,y) - \log Z_{\mathbf{w}}(x)] \\ &= \mathbb{E}_{(x,y) \sim S} [\mathbf{w} \cdot \Phi(x,y)] - \mathbb{E}_{\substack{x \sim \hat{p} \\ y \sim p^*[\cdot|x]}} [\mathbf{w} \cdot \Phi(x,y)]. \end{aligned}$$

Plugging back this equality and rearranging yields

$$\begin{aligned} & \mathbb{E}_{x \sim \hat{p}} [D(p^*[\cdot|x] \parallel p_{\mathbf{w}}[\cdot|x])] \\ &= \mathbb{E}_{x \sim \hat{p}} [D(p^*[\cdot|x] \parallel p_0[\cdot|x])] - \tilde{G}(\mathbf{w}) - \sum_{k=1}^p \beta_k \|\mathbf{w}_k\|_1 \\ & \quad + \mathbf{w} \cdot \left[ \mathbb{E}_{(x,y) \sim S} [\mathbf{w} \cdot \Phi(x,y)] - \mathbb{E}_{\substack{x \sim \hat{p} \\ y \sim p^*[\cdot|x]}} [\mathbf{w} \cdot \Phi(x,y)] \right]. \end{aligned}$$

The solution of the primal optimization,  $p^*$ , verifies the constraint  $I_C(\mathbb{E}_{x \sim \hat{p}} [\Phi(x,y)]) = 0$ , that is  $\|\mathbb{E}_{x \sim \hat{p}} [\Phi(x,y)] - \mathbb{E}_{(x,y) \sim S} [\Phi(x,y)]\|_{\infty} \leq \beta_k$  for all  $k \in [1, p]$ . By Hölder's inequality, this implies that

$$\begin{aligned} & -\sum_{k=1}^p \beta_k \|\mathbf{w}_k\|_1 \\ & \quad + \mathbf{w} \cdot \left[ \mathbb{E}_{(x,y) \sim S} [\mathbf{w} \cdot \Phi(x,y)] - \mathbb{E}_{\substack{x \sim \hat{p} \\ y \sim p^*[\cdot|x]}} [\mathbf{w} \cdot \Phi(x,y)] \right] \\ & \leq -\sum_{k=1}^p \beta_k \|\mathbf{w}_k\|_1 + \sum_{k=1}^p \beta_k \|\mathbf{w}_k\|_1 = 0. \end{aligned}$$

Thus, we can write, for any  $\mathbf{w} \in \mathbb{R}^N$ ,

$$\begin{aligned} & \mathbb{E}_{x \sim \hat{p}} [D(p^*[\cdot|x] \parallel p_{\mathbf{w}}[\cdot|x])] \\ & \leq \mathbb{E}_{x \sim \hat{p}} [D(p^*[\cdot|x] \parallel p_0[\cdot|x])] - \tilde{G}(\mathbf{w}). \end{aligned}$$

Now, assume that  $\mathbf{w}$  verifies  $|\tilde{G}(\mathbf{w}) - \sup_{\mathbf{w} \in \mathbb{R}^N} \tilde{G}(\mathbf{w})| \leq \epsilon$  for some  $\epsilon > 0$ . Then,  $\mathbb{E}_{x \sim \hat{p}} [D(p^*[\cdot|x] \parallel p_0[\cdot|x])] - \tilde{G}(\mathbf{w}) = \sup_{\mathbf{w}} \tilde{G}(\mathbf{w}) - \tilde{G}(\mathbf{w}) \leq \epsilon$  implies  $\mathbb{E}_{x \sim \hat{p}} [D(p^*[\cdot|x] \parallel p_{\mathbf{w}}[\cdot|x])] \leq \epsilon$ . This concludes the proof of the theorem.  $\square$

## B. Pseudocode of StructMaxent1

Figure 2 shows the pseudocode of StructMaxent1.

```

STRUCTMAXENT1( $S = (x_1, \dots, x_m)$ )
1  for  $t \leftarrow 1$  to  $T$  do
2      for  $k \leftarrow 1$  to  $p$  and  $j \leftarrow 1$  to  $N_k$  do
3          if  $(w_{t-1,k,j} \neq 0)$  then
4               $d_{k,j} \leftarrow \beta_k \operatorname{sgn}(w_{t-1,k,j}) + \epsilon_{t-1,k,j}$ 
5              elseif  $|\epsilon_{t-1,k,j}| \leq \beta_k$  then
6                   $d_{k,j} \leftarrow 0$ 
7              else  $d_{k,j} \leftarrow -\beta_k \operatorname{sgn}(\epsilon_{t-1,k,j}) + \epsilon_{t-1,k,j}$ 
8               $(k,j) \leftarrow \operatorname{argmax}_{(k,j) \in [1,p] \times [1,N_k]} |d_{k,j}|$ 
9               $\beta \leftarrow \frac{\bar{\Phi}_{t-1,k,j}^+ \bar{\Phi}_{k,j}^- e^{-2w_{k,j}\Lambda} - \bar{\Phi}_{k,j}^+ \bar{\Phi}_{t-1,k,j}^-}{\bar{\Phi}_{t-1,k,j}^+ e^{-2w_{k,j}\Lambda} - \bar{\Phi}_{t-1,k,j}^-}$ 
10             if  $(|\beta| \leq \beta_k)$  then
11                  $\eta \leftarrow -w_{t-1,k,j}$ 
12             elseif  $(\beta > \beta_k)$  then
13                  $\eta \leftarrow \frac{1}{2\Lambda} \log \left[ \frac{\bar{\Phi}_{t-1,k,j}^-(\beta_k - \bar{\Phi}_{k,j}^+)}{\bar{\Phi}_{t-1,k,j}^+(\beta_k - \bar{\Phi}_{k,j}^-)} \right]$ 
14             else  $\eta \leftarrow \frac{1}{2\Lambda} \log \left[ \frac{\bar{\Phi}_{t-1,k,j}^-(\beta_k + \bar{\Phi}_{k,j}^+)}{\bar{\Phi}_{t-1,k,j}^+(\beta_k + \bar{\Phi}_{k,j}^-)} \right]$ 
15              $\mathbf{w}_t \leftarrow \mathbf{w}_{t-1} + \eta \mathbf{e}_{k,j}$ 
16              $\rho_{\mathbf{w}_t} \leftarrow \frac{\rho_0[x] e^{\mathbf{w}_t \cdot \Phi(x)}}{\sum_{x \in \mathcal{X}} \rho_0[x] e^{\mathbf{w}_t \cdot \Phi(x)}}$ 
17  return  $\rho_{\mathbf{w}_t}$ 
    
```

Figure 2. Pseudocode of the StructMaxent1 algorithm. For all  $(k, j) \in [1, p] \times [1, N_k]$ ,  $\beta_k = 2\mathfrak{R}_m(H_k) + \beta$ ,  $\epsilon_{t-1,k,j} = \mathbb{E}_{\rho_{\mathbf{w}_{t-1}}}[\Phi_{k,j}] - \mathbb{E}_S[\Phi_{k,j}]$  and, for any  $s \in \{-1, +1\}$ ,  $\bar{\Phi}_{t-1,k,j}^s = \mathbb{E}_{\rho_{\mathbf{w}_{t-1}}}[\Phi_{k,j}] + s\Lambda$  and  $\bar{\Phi}_{k,j}^s = \mathbb{E}_S[\Phi_{k,j}] + s\Lambda$ . The closed-form solutions for the step size given here assume that the conditions (8) hold.

### C. Algorithm

In this section we derive the step size for the StructMaxent1 and StructMaxent2 algorithms presented in Section 2.4 and Appendix B.

Observe that

$$\begin{aligned}
 & F(\mathbf{w}_{t-1} + \eta \mathbf{e}_{k,j}) - F(\mathbf{w}_{t-1}) \\
 &= \beta_k (|w_{k,j} + \eta| - |w_{k,j}|) - \eta \mathbb{E}_S[\Phi_{k,j}] + \log \left[ \frac{\mathbb{E}[e^{\eta \Phi_{k,j}}]}{\rho_{\mathbf{w}_{t-1}}} \right].
 \end{aligned} \tag{20}$$

Since  $\Phi_{k,j} \in [-\Lambda, +\Lambda]$ , by the convexity of  $x \mapsto e^{\eta x}$ , we can write

$$e^{\eta \Phi_{k,j}} \leq \frac{\Lambda - \Phi_{k,j}}{2\Lambda} e^{-\eta\Lambda} + \frac{\Phi_{k,j} + \Lambda}{2\Lambda} e^{\eta\Lambda}.$$

Taking the expectation and the log yields

$$\begin{aligned}
 \log \mathbb{E}_{\rho_{\mathbf{w}_{t-1}}} [e^{\eta \Phi_{k,j}}] &\leq \log \left[ \frac{\bar{\Phi}_{t-1,k,j}^+ e^{\eta\Lambda} - \bar{\Phi}_{t-1,k,j}^- e^{-\eta\Lambda}}{2\Lambda} \right] \\
 &= -\eta\Lambda + \log \left[ \frac{\bar{\Phi}_{t-1,k,j}^+ e^{2\eta\Lambda} - \bar{\Phi}_{t-1,k,j}^-}{2\Lambda} \right],
 \end{aligned}$$

where we used the following notation:

$$\bar{\Phi}_{t-1,k,j}^s = \mathbb{E}_{\rho_{\mathbf{w}_{t-1}}} [\Phi_{k,j}] + s\Lambda \quad \bar{\Phi}_{k,j}^s = \mathbb{E}_S [\Phi_{k,j}] + s\Lambda,$$

for all  $(k, j) \in [1, p] \times [1, N_k]$  and  $s \in \{-1, +1\}$ .

Plugging back this inequality in (20) and ignoring constant terms, minimizing the resulting upper bound on  $F(\mathbf{w}_{t-1} + \eta \mathbf{e}_{k,j}) - F(\mathbf{w}_{t-1})$  becomes equivalent to minimizing  $\psi(\eta)$  defined for all  $\eta \in \mathbb{R}$  by

$$\psi(\eta) = \beta_k |w_{k,j} + \eta| - \eta \bar{\Phi}_{k,j}^+ + \log \left[ \bar{\Phi}_{t-1,k,j}^+ e^{2\eta\Lambda} - \bar{\Phi}_{t-1,k,j}^- \right].$$

Let  $\eta^*$  denote the minimizer of  $\psi(\eta)$ . If  $w_{t-1,k,j} + \eta^* = 0$ , then the subdifferential of  $|w_{t-1,k,j} + \eta|$  at  $\eta^*$  is the set  $\{\nu : \nu \in [-1, +1]\}$ . Thus, in that case, the subdifferential  $\partial\psi(\eta^*)$ , contains 0 iff there exists  $\nu \in [-1, +1]$  such that

$$\begin{aligned}
 & \beta_k \nu - \bar{\Phi}_{k,j}^+ + \frac{2\Lambda \bar{\Phi}_{t-1,k,j}^+ e^{2\eta^*\Lambda}}{\bar{\Phi}_{t-1,k,j}^+ e^{2\eta^*\Lambda} - \bar{\Phi}_{t-1,k,j}^-} = 0 \\
 \Leftrightarrow & \bar{\Phi}_{k,j}^+ - \frac{2\Lambda \bar{\Phi}_{t-1,k,j}^+ e^{-2w_{t-1,k,j}\Lambda}}{\bar{\Phi}_{t-1,k,j}^+ e^{-2w_{t-1,k,j}\Lambda} - \bar{\Phi}_{t-1,k,j}^-} = \beta_k \nu.
 \end{aligned}$$

Thus, the condition is equivalent to

$$\left| \bar{\Phi}_{k,j}^+ - \frac{2\Lambda \bar{\Phi}_{t-1,k,j}^+ e^{-2w_{t-1,k,j}\Lambda}}{\bar{\Phi}_{t-1,k,j}^+ e^{-2w_{t-1,k,j}\Lambda} - \bar{\Phi}_{t-1,k,j}^-} \right| \leq \beta_k,$$

which can be rewritten as

$$\left| \frac{\bar{\Phi}_{t-1,k,j}^+ \bar{\Phi}_{k,j}^- e^{-2w_{k,j}\Lambda} - \bar{\Phi}_{k,j}^+ \bar{\Phi}_{t-1,k,j}^-}{\bar{\Phi}_{t-1,k,j}^+ e^{-2w_{k,j}\Lambda} - \bar{\Phi}_{t-1,k,j}^-} \right| \leq \beta_k.$$

If  $w_{t-1,k,j} + \eta^* > 0$ , then  $\psi$  is differentiable at  $\eta^*$  and  $\psi'(\eta^*) = 0$ , that is

$$\begin{aligned}
 & \beta - \bar{\Phi}_{k,j}^+ + \frac{2\Lambda \bar{\Phi}_{t-1,k,j}^+ e^{2\eta^*\Lambda}}{\bar{\Phi}_{t-1,k,j}^+ e^{2\eta^*\Lambda} - \bar{\Phi}_{t-1,k,j}^-} = 0 \\
 \Leftrightarrow & e^{2\eta^*\Lambda} = \frac{\bar{\Phi}_{t-1,k,j}^- (\beta_k - \bar{\Phi}_{k,j}^+)}{\bar{\Phi}_{t-1,k,j}^+ (\beta_k - \bar{\Phi}_{k,j}^-)} \\
 \Leftrightarrow & \eta^* = \frac{1}{2\Lambda} \log \left[ \frac{\bar{\Phi}_{t-1,k,j}^- (\beta_k - \bar{\Phi}_{k,j}^+)}{\bar{\Phi}_{t-1,k,j}^+ (\beta_k - \bar{\Phi}_{k,j}^-)} \right].
 \end{aligned}$$

For the step size  $\eta^*$  to be in  $\mathbb{R}$ , the following conditions must be met:

$$\begin{aligned}
 & (\bar{\Phi}_{t-1,k,j}^- \neq 0) \wedge (\bar{\Phi}_{t-1,k,j}^+ \neq 0) \wedge \\
 & ((\beta_k - \bar{\Phi}_{k,j}^+) < 0) \wedge ((\beta_k - \bar{\Phi}_{k,j}^-) \neq 0),
 \end{aligned}$$

that is

$$(\mathbb{E}_{\rho_{\mathbf{w}_{t-1}}} [\Phi_{k,j}] \notin \{-\Lambda, +\Lambda\}) \wedge (\mathbb{E}_S [\Phi_{k,j}] > -\Lambda + \beta_k). \tag{21}$$

The condition  $w_{t-1,k,j} + \eta^* > 0$  is equivalent to  $e^{2\eta^*\Lambda} > e^{-2w_{t-1,k,j}\Lambda}$ , which, in view of the expression of  $e^{2\eta^*\Lambda}$  given above can be written as

$$\frac{\bar{\Phi}_{t-1,k,j}^+ \bar{\Phi}_{k,j}^- e^{-2w_{k,j}\Lambda} - \bar{\Phi}_{k,j}^+ \bar{\Phi}_{t-1,k,j}^-}{\bar{\Phi}_{t-1,k,j}^+ e^{-2w_{k,j}\Lambda} - \bar{\Phi}_{t-1,k,j}^-} > \beta_k.$$

Similarly, if  $w_{t-1,k,j} + \eta^* < 0$ ,  $\psi$  is differentiable at  $\eta^*$  and  $\psi'(\eta^*) = 0$ , which gives

$$\eta^* = \frac{1}{2\Lambda} \log \left[ \frac{\bar{\Phi}_{t-1,k,j}^- (\beta_k + \bar{\Phi}_{k,j}^+)}{\bar{\Phi}_{t-1,k,j}^+ (\beta_k + \bar{\Phi}_{k,j}^-)} \right].$$

Again for the step size  $\eta^*$  to be in  $\mathbb{R}$ , the following conditions must be met:

$$\begin{aligned} & (\bar{\Phi}_{t-1,k,j}^- \neq 0) \wedge (\bar{\Phi}_{t-1,k,j}^+ \neq 0) \wedge \\ & ((\beta_k + \bar{\Phi}_{k,j}^+) \neq 0) \wedge ((\beta_k + \bar{\Phi}_{k,j}^-) < 0), \end{aligned}$$

that is

$$(\mathbb{E}_{\mathbf{P}_{\mathbf{w}_{t-1}}} [\Phi_{k,j}] \notin \{-\Lambda, +\Lambda\}) \wedge (\mathbb{E}_S [\Phi_{k,j}] < \Lambda - \beta_k).$$

Combining with condition 21, the following condition on  $\Phi$ ,  $\Lambda$  and  $\beta_k$  must be satisfied:

$$\begin{aligned} & (\mathbb{E}_{\mathbf{P}_{\mathbf{w}_{t-1}}} [\Phi_{k,j}] \notin \{-\Lambda, +\Lambda\}) \wedge \\ & (-\Lambda + \beta_k < \mathbb{E}_S [\Phi_{k,j}] < \Lambda - \beta_k). \end{aligned}$$

Figure 2 shows the pseudocode of our algorithm using the closed-form solution for the step size just presented.

An alternative method consists of using a somewhat looser upper bound for  $\log \mathbb{E}_{\mathbf{P}_{\mathbf{w}_{t-1}}} [e^{\eta\Phi_{k,j}}]$  using Hoeffding's lemma and  $\Phi_{k,j} \in [-\Lambda, +\Lambda]$ :

$$\log \mathbb{E}_{\mathbf{P}_{\mathbf{w}_{t-1}}} [e^{\eta\Phi_{k,j}}] \leq \eta \mathbb{E}_{\mathbf{P}_{\mathbf{w}_{t-1}}} [\Phi_{k,j}] + \frac{\eta^2 \Lambda^2}{2}.$$

Combining this inequality with (20) and disregarding constant terms, minimizing the resulting upper bound on  $F(\mathbf{w}_{t-1} + \eta \mathbf{e}_{k,j}) - F(\mathbf{w}_{t-1})$  becomes equivalent to minimizing  $\varphi(\eta)$  defined for all  $\eta \in \mathbb{R}$  by

$$\varphi(\eta) = \beta_k |w_{k,j} + \eta| + \eta \epsilon_{t-1,k,j} + \frac{\eta^2 \Lambda^2}{2}.$$

Let  $\eta^*$  denote the minimizer of  $\varphi(\eta)$ . If  $w_{t-1,k,j} + \eta^* = 0$ , then the subdifferential of  $|w_{t-1,k,j} + \eta|$  at  $\eta^*$  is the set  $\{\nu: \nu \in [-1, +1]\}$ . Thus, in that case, the subdifferential  $\partial\varphi(\eta^*)$  contains 0 iff there exists  $\nu \in [-1, +1]$  such that

$$\beta_k \nu + \epsilon_{t-1,k,j} + \eta^* \Lambda^2 = 0 \Leftrightarrow w_{t-1,k,j} \Lambda^2 - \epsilon_{t-1,k,j} = \beta_k \nu.$$

The condition is therefore equivalent to

$$|w_{t-1,k,j} \Lambda^2 - \epsilon_{t-1,k,j}| \leq \beta_k.$$

If  $w_{t-1,k,j} + \eta^* > 0$ , then  $\varphi$  is differentiable at  $\eta^*$  and  $\varphi'(\eta^*) = 0$ , that is

$$\beta_k + \epsilon_{t-1,k,j} + \eta^* \Lambda^2 = 0 \Leftrightarrow \eta^* = \frac{1}{\Lambda^2} [-\beta_k - \epsilon_{t-1,k,j}].$$

In view of that expression, the condition  $w_{t-1,k,j} + \eta^* > 0$  is equivalent to

$$w_{t-1,k,j} \Lambda^2 - \epsilon_{t-1,k,j} > \beta_k.$$

Similarly, if  $w_{t-1,k,j} + \eta^* < 0$ ,  $\varphi$  is differentiable at  $\eta^*$  and  $\varphi'(\eta^*) = 0$ , which gives

$$\eta^* = \frac{1}{\Lambda^2} [\beta_k - \epsilon_{t-1,k,j}].$$

Figure 1 shows the pseudocode of our algorithm using the closed-form solution for the step size just presented.

## D. Convergence analysis

In this section, we give convergence guarantees for both versions of the StructMaxent algorithm.

**Theorem 3.** *Let  $(\mathbf{w}_t)_t$  be the sequence of parameter vectors generated by StructMaxent1 or StructMaxent2. Then,  $(\mathbf{w}_t)_t$  converges to the optimal solution  $\mathbf{w}^*$  of (6).*

*Proof.* We begin with the proof for StructMaxent2. Our proof is based on Lemma 19 of (Dudík et al., 2007), which implies that it suffices to show that  $F(\mathbf{w}_t)$  admits a finite limit and that there exists a sequence  $\mathbf{u}_t$  such that  $R(\mathbf{u}_t, \mathbf{w}_t) \rightarrow 0$  as  $t \rightarrow \infty$ , where  $R$  is some auxiliary function. A function  $R$  is said to be *auxiliary* if

$$\begin{aligned} R(\mathbf{u}, \mathbf{w}) = & I_C(\mathbf{u}) + \sum_{k=1}^p \beta_k \|\mathbf{w}_k\|_1 + \mathbf{w} \cdot \mathbb{E}_S [\Phi] + \mathbf{w} \cdot \mathbf{u} \\ & + B(\mathbf{u} \parallel \mathbb{E}_{\mathbf{P}_{\mathbf{w}}} [\Phi]), \end{aligned}$$

where  $B$  is a Bregman divergences. We will use the Bregman divergence based on the squared difference:

$$B(\mathbf{u} \parallel \mathbb{E}_{\mathbf{P}_{\mathbf{w}}} [\Phi]) = \frac{\|\mathbf{u} - \mathbb{E}_{\mathbf{P}_{\mathbf{w}}} [\Phi]\|_2^2}{2\Lambda^2}.$$

Let  $g_0(\mathbf{u}) = I_C(\mathbf{u}) + \mathbf{w} \cdot \mathbf{u}$  and observe that using the same arguments as in the proof of Theorem 1, we can write

$$\begin{aligned} g_0^*(\mathbf{r}) = & \sup_{\mathbf{u} \in C} ((\mathbf{r} - \mathbf{w}) \cdot \mathbf{u} - I_C(\mathbf{u})) \\ = & (\mathbf{r} - \mathbf{w}) \cdot \mathbb{E}_S [\Phi] + \sum_{k=1}^p \beta_k \|\mathbf{r}_k - \mathbf{w}_k\|_1. \end{aligned}$$

Similarly, if  $f_0(\mathbf{u}) = B(\mathbf{u} \parallel \mathbb{E}_{\rho_{\mathbf{w}}}[\Phi])$ , then

$$\begin{aligned} f_0^*(\mathbf{r}) &= \sup_{\mathbf{u}} (\mathbf{r} \cdot \mathbf{u} - B(\mathbf{u} \parallel \mathbb{E}_{\rho_{\mathbf{w}}}[\Phi])) \\ &= \frac{\Lambda^2 \|\mathbf{r}\|_2}{2} + \mathbf{r} \cdot \mathbb{E}_{\rho_{\mathbf{w}}}[\Phi]. \end{aligned}$$

Therefore, applying Theorem 5 with  $A = I$ , we obtain

$$\begin{aligned} \inf_{\mathbf{u}} R(\mathbf{u}, \mathbf{w}_t) &= \sup_{\mathbf{r}} \left( -\frac{\Lambda^2 \|\mathbf{r}\|_2}{2} - \mathbf{r} \cdot \mathbb{E}_{\rho_{\mathbf{w}_t}}[\Phi] - \mathbf{r} \cdot \mathbb{E}_S[\Phi] \right. \\ &\quad \left. + \sum_{k=1}^p \beta_k (\|\mathbf{w}_{t,k}\|_1 - \|\mathbf{r}_k + \mathbf{w}_{t,k}\|_1) \right), \end{aligned}$$

and we define  $\mathbf{u}_t$  to be the solution of this optimization problem, which, in view of Theorem 5, does exist. We will now argue that  $R(\mathbf{u}_t, \mathbf{w}_t) \rightarrow 0$  as  $t \rightarrow \infty$ . Note that

$$\begin{aligned} R(\mathbf{u}_t, \mathbf{w}_t) &= -\sum_{k=1}^p \sum_{j=1}^{N_k} \inf_r \left( \frac{\lambda^2 r}{2} + r(\mathbb{E}_{\rho_{\mathbf{w}_t}}[\Phi_{k,j}] - \mathbb{E}_S[\Phi_{k,j}]) \right. \\ &\quad \left. + \beta_k |w_{t,k,j}| - \beta_k |r + w_{t,k,j}| \right). \end{aligned}$$

Recall that, by definition of StructMaxent2, the following holds for all  $(k, j) \in [1, p] \times [1, N_k]$ :

$$\begin{aligned} F(\mathbf{w}_t) - F(\mathbf{w}_{t+1}) & \quad (22) \\ &\geq -\inf_r \left( \frac{\Lambda^2 r}{2} + r(\mathbb{E}_{\rho_{\mathbf{w}_t}}[\Phi_{k,j}] - \mathbb{E}_S[\Phi_{k,j}]) \right. \\ &\quad \left. + \beta_k |w_{t,k,j}| - \beta_k |r + w_{t,k,j}| \right) \\ &\geq 0, \end{aligned}$$

where the last inequality follows by taking  $r = 0$ . Therefore, to complete the proof, it suffices to show that  $\lim_{t \rightarrow \infty} F(\mathbf{w}_t)$  is finite, since then  $F(\mathbf{w}_t) - F(\mathbf{w}_{t+1}) \rightarrow 0$  and  $R(\mathbf{u}_t, \mathbf{w}_t) \rightarrow 0$ . By (22),  $F(\mathbf{w}_t)$  is decreasing and it suffices to show that  $F(\mathbf{w}_t)$  is bounded below. This is an immediate consequence of the feasibility of the optimization problem  $\inf_{\mathbf{w}} F(\mathbf{w})$  which was established in Section 2.2 and the proof for StructMaxent2 is now complete.

The proof for StructMaxent1 requires the use a different Bregman divergence  $B$  defined as follows:

$$B(\mathbf{u} \parallel \mathbb{E}_{\rho_{\mathbf{w}}}[\Phi]) = \sum_{k=1}^p \sum_{j=1}^{N_k} D_0(\varphi_{kj}(\mathbf{u}) \parallel \varphi_{kj}(\mathbb{E}_{\rho_{\mathbf{w}}}[\Phi])),$$

where  $D_0$  is unnormalized relative entropy,  $\varphi_{kj}(\mathbf{u}) = ((\Lambda - u_{k,j}), (\Lambda + u_{k,j}))$  and  $\|\mathbf{u}\|_{\infty} \leq \Lambda$ . The rest of the argument remains the same.  $\square$

## E. Bounds on Rademacher complexities

In this section, we give the proof of the upper bounds on Rademacher complexities given in (15):

$$\begin{aligned} \mathfrak{R}_m(H_k^{\text{mono}}) &\leq \sqrt{\frac{2k \log d}{m}} \\ \mathfrak{R}_m(H_k^{\text{trees}}) &\leq \sqrt{\frac{(4k+2) \log_2(d+2) \log(m+1)}{m}}. \end{aligned}$$

The first inequality is an immediate consequence of Massart's lemma, which states that

$$\frac{1}{m} \mathbb{E}_{\sigma} \left[ \sup_{\mathbf{x} \in A} \sum_{i=1}^m \sigma_i x_i \right] \leq \frac{r \sqrt{2 \log |A|}}{m},$$

where  $A \subset \mathbb{R}^n$  is a finite set,  $r = \max_{\mathbf{x} \in A} \|\mathbf{x}\|_2$  and  $\sigma_i$ s are Rademacher random variables. If we take  $A$  to be the image of the sample under  $H_k^{\text{mono}}$  then  $|A| \leq |H_k^{\text{mono}}| \leq d^k$ . Moreover, if the features in  $H_1^{\text{mono}}$  are normalized to belong to  $[-1, 1]$  then  $\Lambda = 1$  and  $r = \sqrt{m}$ . Combining these results with Massart's lemma leads to the desired bound.

Now we derive the second bound of (15). Since each binary decision tree in  $H_k^{\text{trees}}$ , can be viewed as a binary classifier, Massart's lemma yields that

$$\mathfrak{R}_m(H_k^{\text{trees}}) \leq \sqrt{\frac{2 \log \Pi_{H_k^{\text{trees}}}(m)}{m}},$$

where  $\Pi_{H_k^{\text{trees}}}(m)$  is the growth function of  $H_k^{\text{trees}}$ . We use Sauer's lemma to bound the growth function:  $\Pi_{H_k^{\text{trees}}}(m) \leq (em)^{\text{VC-dim}(H_k^{\text{trees}})}$ . For the family of binary decision trees in dimension  $d$  it is known that  $\text{VC-dim}(H_k^{\text{trees}}) \leq (2k+1) \log_2(d+2)$  (Mansour, 1997) and the desired bound follows.
